# Supplementary material for: Ternary 14-electron XB2Be2 (X = Si, Ge, Sn, Pb) clusters: a planar tetracoordinate silicon (ptSi) system and its ptGe/Sn/Pb congeners
Source: Royal Society of Chemistry journal article supplement (doi:10.1039/d1cp05226h), 2022-01-01

## SUPPLEMENTARY INFORMATION

### Ternary 14-electron $\text{XB}_2\text{Be}_2$ ( $\text{X} = \text{Si}, \text{Ge}, \text{Sn}, \text{Pb}$ ) clusters: planar tetracoordinate silicon (ptSi) system and its ptGe/Sn/Pb congeners

Lian-Qing Zhao, Jin-Chang Guo, and Hua-Jin Zhai\*

*Nanocluster Laboratory, Institute of Molecular Science, Shanxi University, Taiyuan 030006, China*

\*E-mail: hj.zhai@sxu.edu.cn

- Table S1.** Cartesian coordinates for optimized global-minimum (GM) clusters **1–4** of the  $\text{XB}_2\text{Be}_2$  ( $\text{X} = \text{Si}, \text{Ge}, \text{Sn}, \text{Pb}$ ) systems at the PBE0-D3/def2-QZVP level.
- Table S2.** Composition analysis for occupied canonical molecular orbitals (CMOs) of  $\text{SiB}_2\text{Be}_2$  GM cluster **1**. Main components are highlighted in **bold**.
- Table S3.** Composition analysis for CMOs of  $\text{PbB}_2\text{Be}_2$  GM cluster **4**. Main components are highlighted in **bold**.
- Figure S1.** Optimized structures of GM clusters **1–4** and three lowest-lying isomers (**nB–nD**) for the  $\text{XB}_2\text{Be}_2$  ( $\text{X} = \text{Si}, \text{Ge}, \text{Sn}, \text{Pb}$ ) systems at the PBE0-D3/def2-QZVP level. Relative energies are listed in kcal mol<sup>-1</sup> at the PBE0-D3/def2-QZVP and single-point CCSD(T)/def2-QZVP//PBE0-D3/def2-QZVP (in square brackets) levels. Shown in curly brackets are complementary energetics data at the single-point CCSD(T)/def2-QZVP

//B3LYP-D3/def2-QZVP level. All three sets of relative energies include zero-point energy (ZPE) corrections at PBE0-D3 or B3LYP-D3.

**Figure S2.** Wiberg bond indices (WBIs; in black color) and natural atomic charges (in |e|; red color) for GM clusters **1–4**, calculated at the PBE0-D3/def2-QZVP level.

**Figure S3.** Comparative root-mean-square deviations (RMSDs) of cluster **1** during the Born-Oppenheimer molecular dynamics (BOMD) simulations at room temperature (298 K) and at a higher temperature (1200 K).

**Figure S4.** Chemical bonding analyses for GM cluster **4**. (a) Occupied CMOs. (b) AdNDP scheme. Occupation numbers (ONs) are shown.

**Figure S5.** Electron localization functions (ELFs),  $ELF_{\sigma}$  and  $ELF_{\pi}$ , for GM cluster **4**. (a)  $ELF_{\sigma}$  for peripheral Lewis-type two-center two-electron (2c-2e)  $\sigma$  bonds. (b)  $ELF_{\pi}$  for global  $2\pi$  electrons. (c)  $ELF_{\sigma}$  for global  $2\sigma$  electrons.

**Table S1.** Cartesian coordinates for optimized global-minimum (GM) clusters **1–4** of the  $\text{XB}_2\text{Be}_2$  ( $X = \text{Si, Ge, Sn, Pb}$ ) systems at the PBE0-D3/def2-QZVP level.

**1**  $\text{SiB}_2\text{Be}_2$  ( $C_{2v}, {}^1A_1$ )

|    |            |             |             |
|----|------------|-------------|-------------|
| Si | 0.00000000 | 0.00000000  | 0.81445500  |
| Be | 0.00000000 | 1.93405800  | 0.08620500  |
| Be | 0.00000000 | -1.93405800 | 0.08620500  |
| B  | 0.00000000 | 0.77415100  | -1.20920100 |
| B  | 0.00000000 | -0.77415100 | -1.20920100 |

**2**  $\text{GeB}_2\text{Be}_2$  ( $C_{2v}, {}^1A_1$ )

|    |            |             |             |
|----|------------|-------------|-------------|
| Ge | 0.00000000 | 0.00000000  | 0.56283600  |
| Be | 0.00000000 | 1.93517700  | -0.27962800 |
| Be | 0.00000000 | -1.93517700 | -0.27962800 |
| B  | 0.00000000 | 0.77561700  | -1.57737300 |
| B  | 0.00000000 | -0.77561700 | -1.57737300 |

**3**  $\text{SnB}_2\text{Be}_2$  ( $C_{2v}, {}^1A_1$ )

|    |            |             |             |
|----|------------|-------------|-------------|
| Sn | 0.00000000 | 0.00000000  | 0.48193500  |
| Be | 0.00000000 | 2.00600900  | -0.65138100 |
| Be | 0.00000000 | -2.00600900 | -0.65138100 |
| B  | 0.00000000 | 0.77444500  | -1.88857000 |
| B  | 0.00000000 | -0.77444500 | -1.88857000 |

**4**  $\text{PbB}_2\text{Be}_2$  ( $C_{2v}, {}^1A_1$ )

|    |            |             |             |
|----|------------|-------------|-------------|
| Pb | 0.00000000 | 0.00000000  | 0.34915700  |
| Be | 0.00000000 | 2.00395000  | -0.90326700 |
| Be | 0.00000000 | -2.00395000 | -0.90326700 |
| B  | 0.00000000 | 0.77337500  | -2.14047400 |
| B  | 0.00000000 | -0.77337500 | -2.14047400 |

**Table S2.** Composition analysis for occupied canonical molecular orbitals (CMOs) of SiB<sub>2</sub>Be<sub>2</sub> GM cluster **1**. Main components are highlighted in **bold**.

| 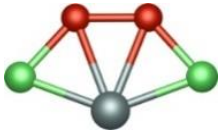<br>         | Si (%)      |             | Be (%)      |             | B (%)       |             |
|-----------------------------------------------------------------------------------------------|-------------|-------------|-------------|-------------|-------------|-------------|
|                                                                                               | 3s          | 3p          | 2s          | 2p          | 2s          | 2p          |
| <br>HOMO     | 3.5         | <b>22.7</b> | <b>18.2</b> | 2.9         | <b>10.0</b> | <b>42.7</b> |
| <br>HOMO-1   | 0.0         | <b>37.8</b> | 2.4         | <b>27.5</b> | <b>13.5</b> | <b>18.3</b> |
| <br>HOMO-2   | 0.0         | <b>34.7</b> | 0.0         | <b>14.0</b> | 0.0         | <b>51.3</b> |
| <br>HOMO-3 | 6.1         | 6.9         | <b>10.6</b> | <b>10.0</b> | 2.7         | <b>63.1</b> |
| <br>HOMO-4 | <b>36.5</b> | 4.8         | 3.0         | 9.1         | <b>24.6</b> | <b>20.6</b> |
| <br>HOMO-5 | 0.0         | <b>23.5</b> | <b>17.1</b> | 4.1         | <b>24.2</b> | <b>29.1</b> |
| <br>HOMO-6 | <b>25.4</b> | 5.8         | 6.3         | 4.9         | <b>39.4</b> | <b>16.1</b> |

**Table S3.** Composition analysis for CMOs of  $\text{PbB}_2\text{Be}_2$  GM cluster **4**. Main components are highlighted in **bold**.

| 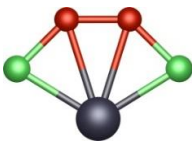             | Pb (%)      |             | Be (%)      |             | B (%)       |             |
|-----------------------------------------------------------------------------------------------|-------------|-------------|-------------|-------------|-------------|-------------|
|                                                                                               | 6s          | 6p          | 2s          | 2p          | 2s          | 2p          |
| <br>HOMO     | 3.4         | <b>19.0</b> | <b>12.9</b> | 5.3         | 7.9         | <b>50.7</b> |
| <br>HOMO-1   | 0.0         | <b>25.9</b> | 0.0         | <b>16.9</b> | 0.0         | <b>57.0</b> |
| <br>HOMO-2  | 0.0         | <b>40.6</b> | 9.2         | <b>27.6</b> | <b>10.6</b> | <b>10.4</b> |
| <br>HOMO-3 | 5.4         | 7.2         | <b>13.8</b> | 4.7         | 0.6         | <b>67.5</b> |
| <br>HOMO-4 | 0.0         | <b>11.1</b> | <b>22.0</b> | 2.2         | <b>27.2</b> | <b>34.2</b> |
| <br>HOMO-5 | <b>39.0</b> | 2.8         | 0.0         | 6.8         | <b>36.2</b> | <b>11.2</b> |
| <br>HOMO-6 | <b>33.2</b> | 2.8         | 8.3         | 5.0         | <b>33.1</b> | <b>12.1</b> |

**Figure S1.** Optimized structures of GM clusters **1–4** and three lowest-lying isomers (**nB–nD**) for the  $\text{XB}_2\text{Be}_2$  ( $\text{X} = \text{Si}, \text{Ge}, \text{Sn}, \text{Pb}$ ) systems at the PBE0-D3/def2-QZVP level. Relative energies are listed in  $\text{kcal mol}^{-1}$  at the PBE0-D3/def2-QZVP and single-point CCSD(T)/def2-QZVP//PBE0-D3/def2-QZVP (in square brackets) levels. Shown in curly brackets are complementary energetics data at the single-point CCSD(T)/def2-QZVP//B3LYP-D3/def2-QZVP level. All three sets of relative energies include zero-point energy (ZPE) corrections at PBE0-D3 or B3LYP-D3.

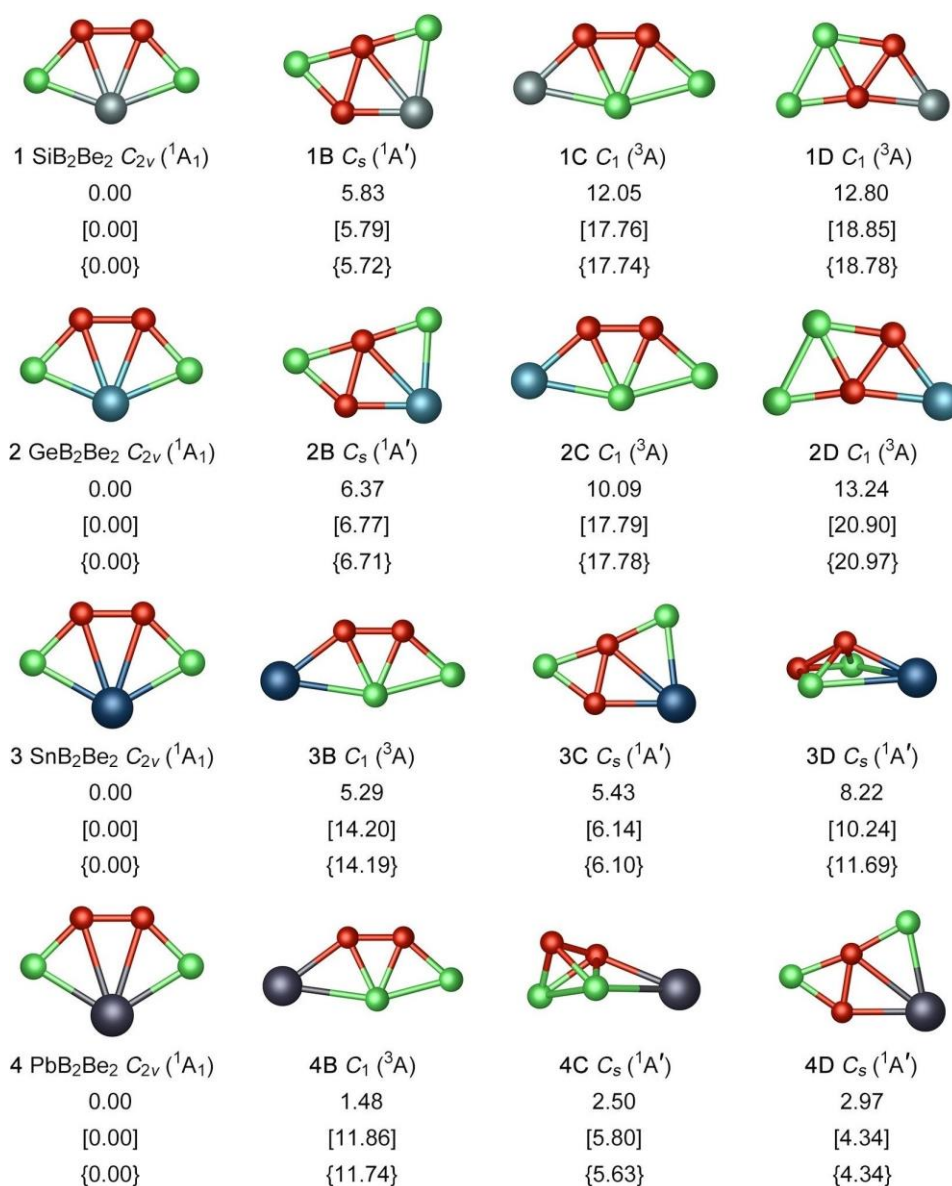

**Figure S2.** Wiberg bond indices (WBIs; in black color) and natural atomic charges (in |e|; red color) for GM clusters **1–4**, calculated at the PBE0-D3/def2-QZVP level.

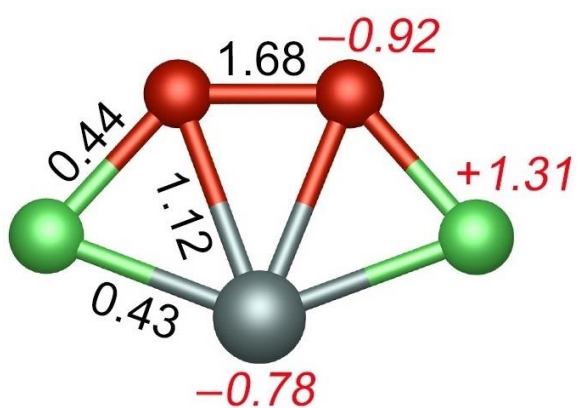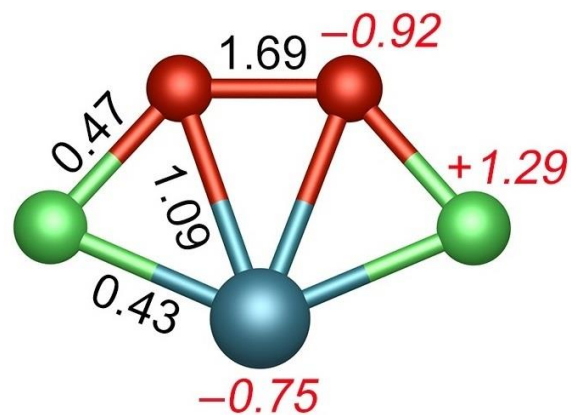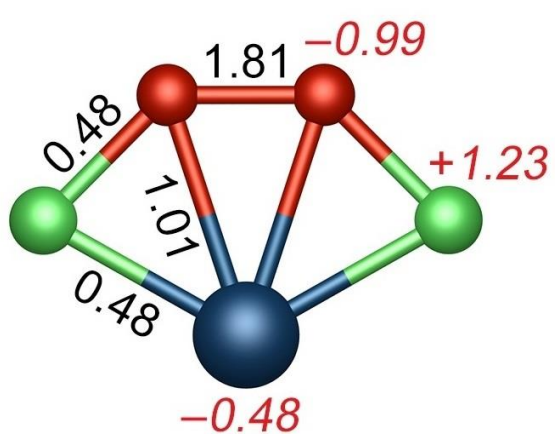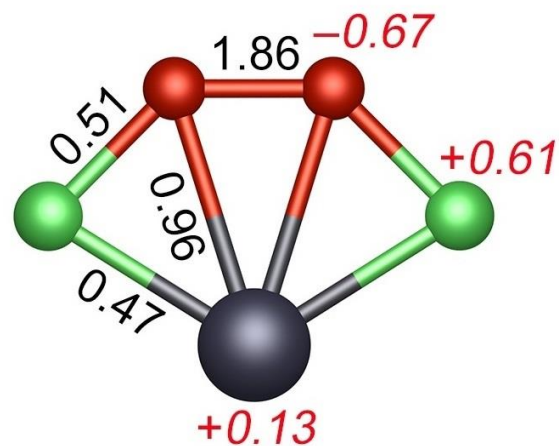

**Figure S3.** Comparative root-mean-square deviations (RMSDs) of cluster **1** during the Born-Oppenheimer molecular dynamics (BOMD) simulations at room temperature (298 K) and at a higher temperature (1200 K).

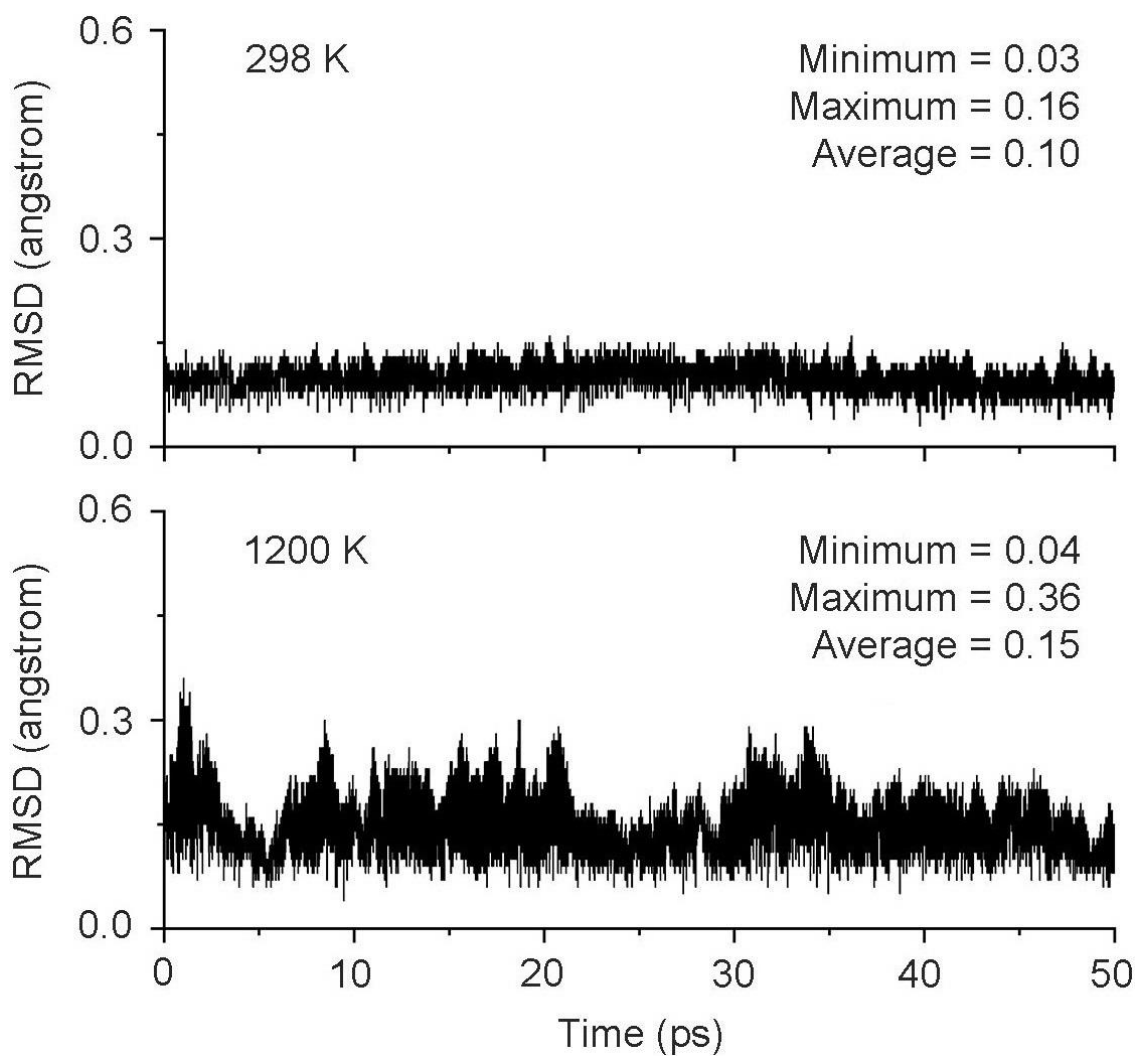



**Figure S4.** Chemical bonding analyses for GM cluster **4**. (a) Occupied CMOs. (b) AdNDP scheme. Occupation numbers (ONs) are shown.

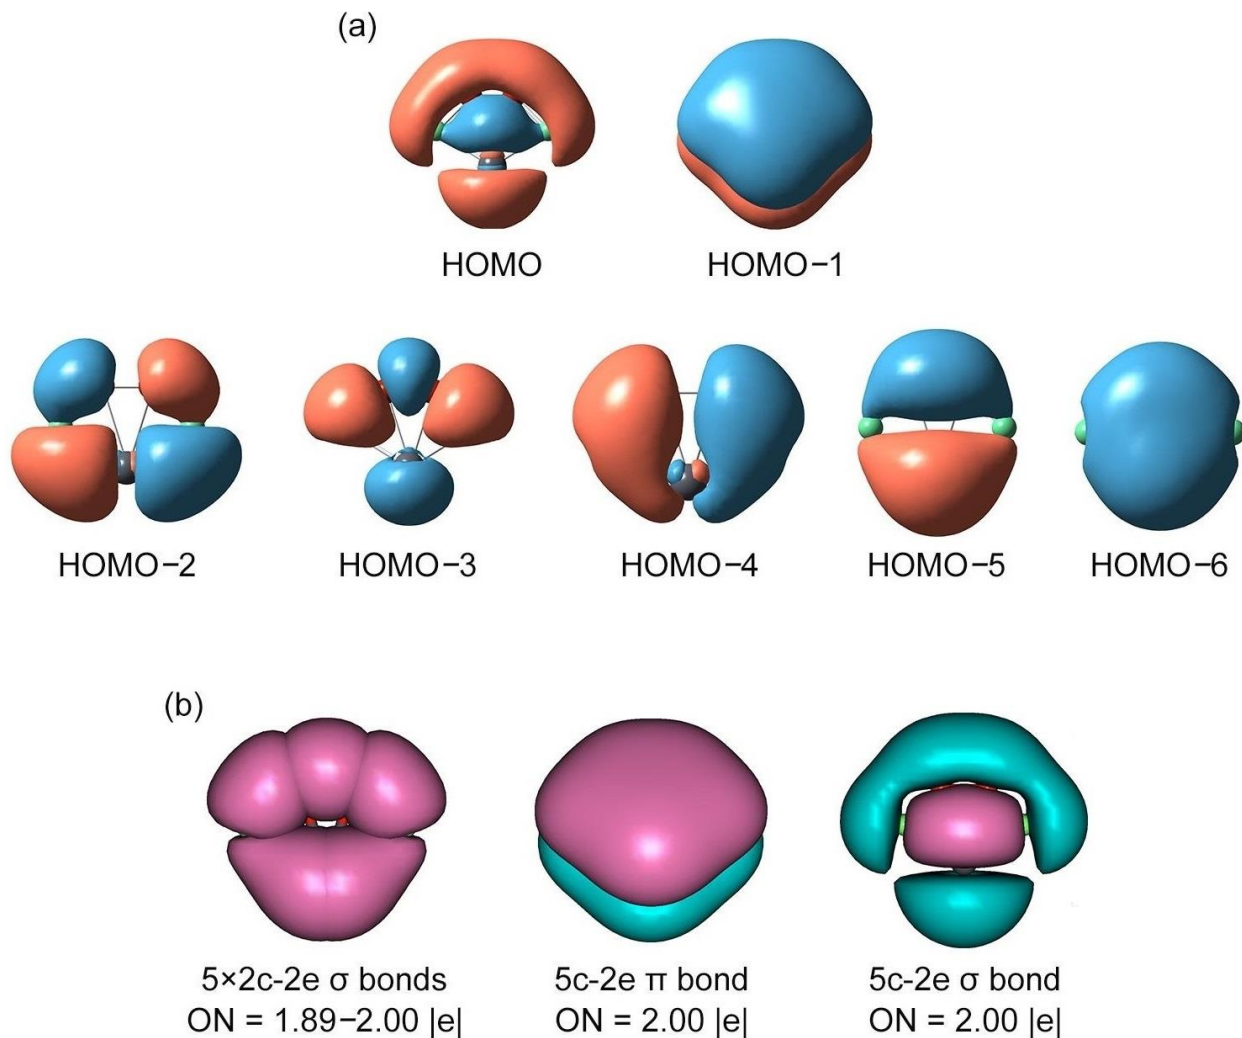

**Figure S5.** Electron localization functions (ELFs),  $ELF_{\sigma}$  and  $ELF_{\pi}$ , for GM cluster 4. (a)  $ELF_{\sigma}$  for peripheral Lewis-type two-center two-electron (2c-2e)  $\sigma$  bonds. (b)  $ELF_{\pi}$  for global  $2\pi$  electrons. (c)  $ELF_{\sigma}$  for global  $2\sigma$  electrons.

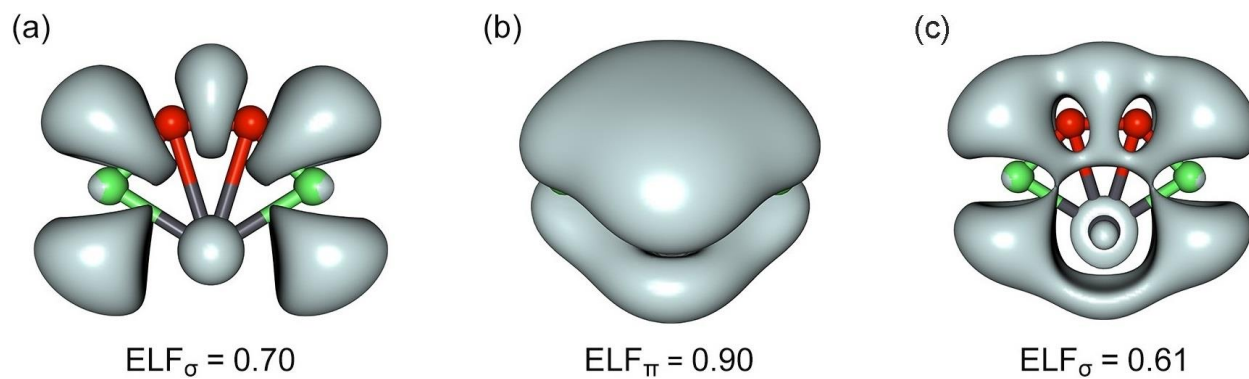

Supplement: d1cp05226h1.pdf [file d1cp05226h1.pdf]
